# Supplementary material for: Activation of Toll-like Receptor 2 (TLR2) induces Interleukin-6 trans-signaling
Source: PubMed Central journal article supplement (PMC6513869; doi:10.1038/s41598-019-43617-5), 2019-05-13
Supplement: 41598_2019_43617_MOESM1_ESM.pdf [file 41598_2019_43617_MOESM1_ESM.pdf]

# **Activation of Toll-like Receptor 2 (TLR2) induces Interleukin-6 trans-signaling**

Charlotte M. Flynn<sup>1</sup>, Yvonne Garbers<sup>2</sup>, Juliane Lokau<sup>1,§</sup>, Daniela Wesch<sup>3</sup>, Dominik M. Schulte<sup>4</sup>, Matthias Laudes<sup>4</sup>, Wolfgang Lieb<sup>5</sup>, Samadhi Aparicio-Siegmund<sup>1</sup> and Christoph Garbers<sup>1,\*,§</sup>

<sup>1</sup>Institute of Biochemistry, Kiel University, Kiel, Germany;

<sup>2</sup>Institute of Psychology, Kiel University, Kiel, Germany;

<sup>3</sup>Institute of Immunology, University Hospital Schleswig-Holstein, Campus Kiel, Kiel, Germany;

<sup>4</sup>Department of Internal Medicine 1, Kiel University, Kiel, Germany;

<sup>5</sup>Institute of Epidemiology, Kiel University, Kiel, Germany

\*Correspondence to: Dr. Christoph Garbers ([christoph.garbers@med.ovgu.de](mailto:christoph.garbers@med.ovgu.de), +49 391 67-15488), Department of Pathology, Otto-von-Guericke-University Magdeburg, Medical Faculty, Magdeburg, Germany; Fax: +49 391 67-15818

§present address: Department of Pathology, Otto-von-Guericke-University Magdeburg, Medical Faculty, Magdeburg, Germany

Figure 5E

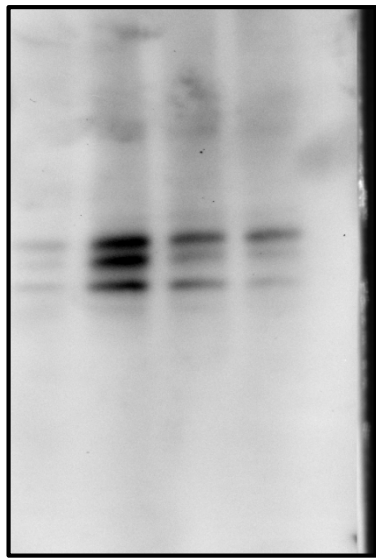

pERK

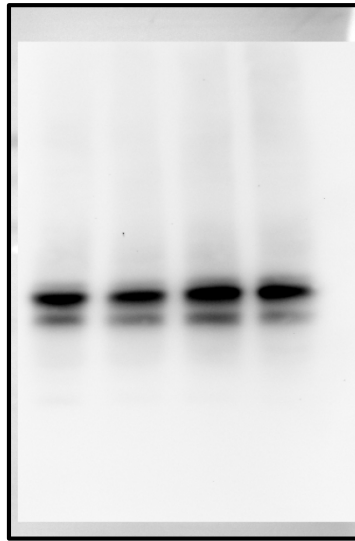

ERK

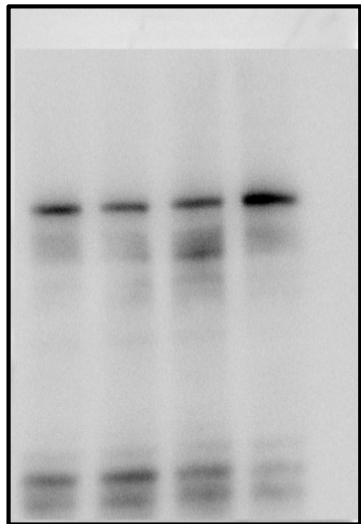

Actinin

Figure 5F

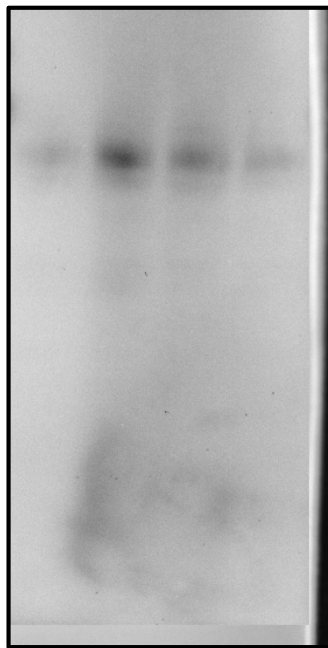

p-p38

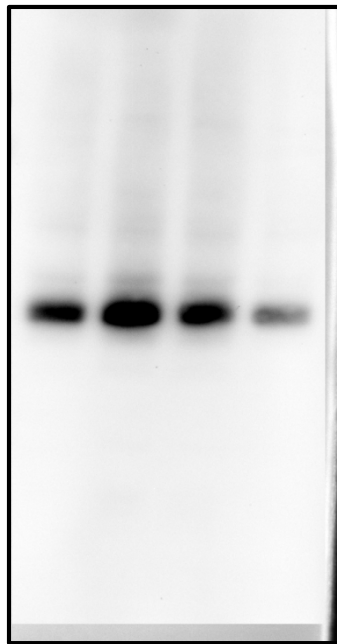

p38

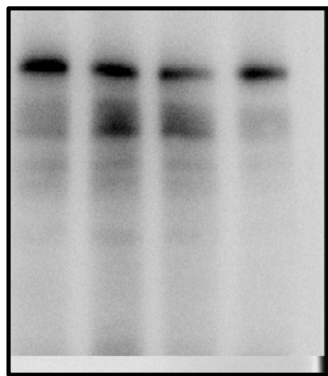

Actinin

Figure 5G

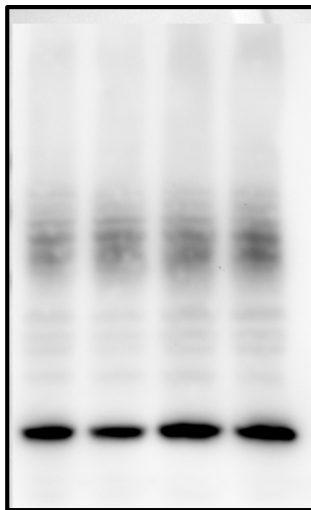

p-p65

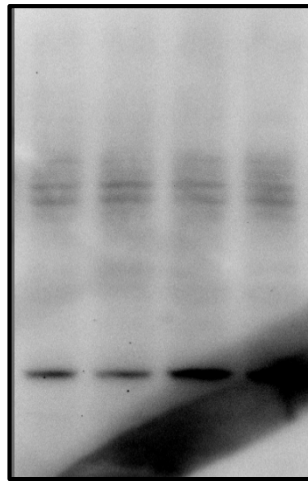

p65

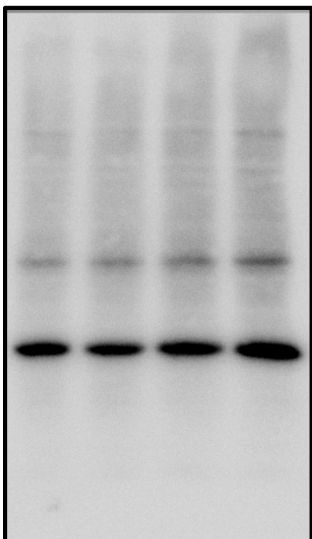

GAPDH
